# Supplementary material
Source: PubMed Central journal article supplement (PMC4422368)

Supplementary Figure 1

A

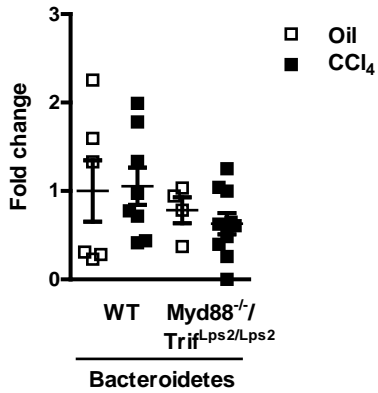

B

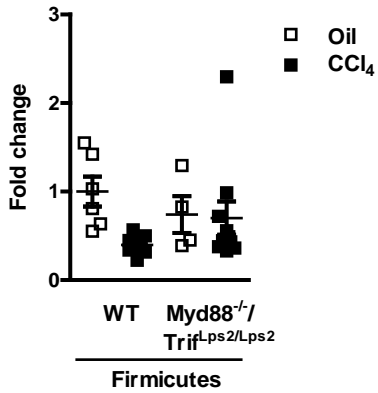

Supplement: supp_fj.14-259515_Supplemental_Figure1.pdf [file supp_fj.14-259515_Supplemental_Figure1.pdf]

Supplementary Figure 2

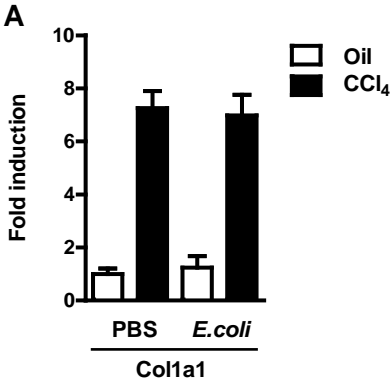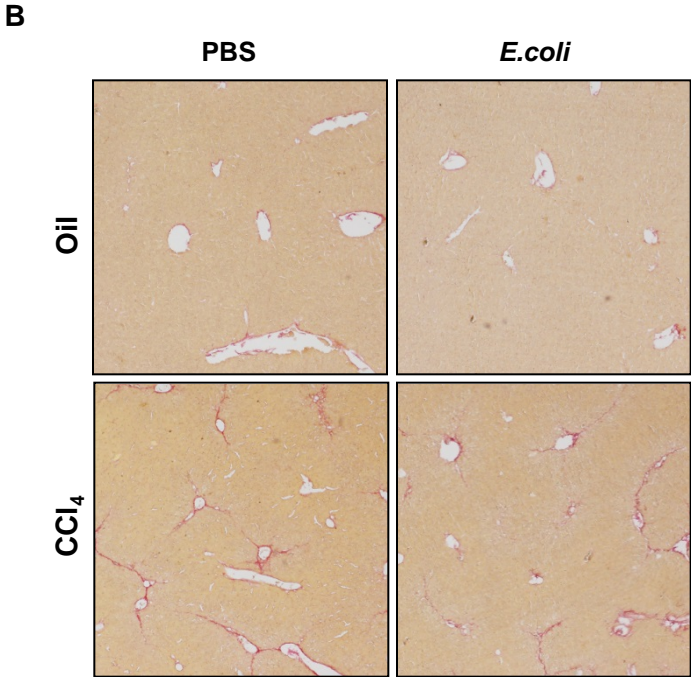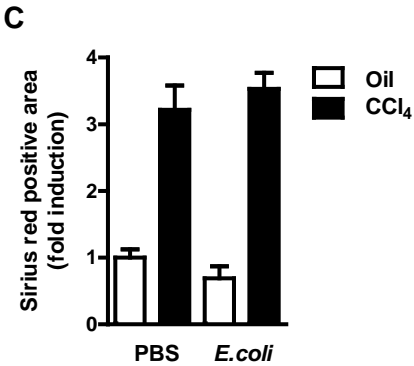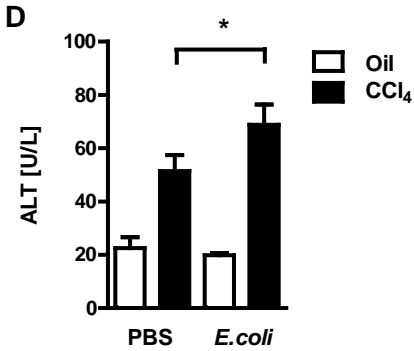

Supplement: supp_fj.14-259515_Supplemental_Figure2.pdf [file supp_fj.14-259515_Supplemental_Figure2.pdf]
